# Supplementary material
Source: publisher figshare collection journal article supplement (https://karger.figshare.com/articles/dataset/_/5798988)
Supplement: Supplementary file 1 [file 1]

## Supplementary material

### **Social and behavioural determinants of the difference in survival among older adults in Japan and England**

**Short title: Differences in Survival among Older Adults in Japan and England**

Authors: Jun Aida <sup>1\*</sup>, Noriko Cable <sup>2</sup>, Paola Zaninotto <sup>2</sup>, Toru Tsuboya <sup>1</sup>, Georgios Tsakos <sup>2</sup>,

Yusuke Matsuyama <sup>1</sup>, Kanade Ito <sup>3</sup>, Ken Osaka <sup>1</sup>, Katsunori Kondo <sup>4</sup>,

Michael Marmot <sup>2</sup>, Richard G Watt <sup>2</sup>

#### Affiliations:

<sup>1</sup> Center for Epidemiology, Biostatistics and Clinical Research, Tohoku University  
Graduate School of Dentistry, 4-1 Seiryō-machi, Aoba-ku, Sendai, Miyagi 980-8575, Japan.

<sup>2</sup>Department of Epidemiology and Public Health, University College London, 1-19  
Torrington Place, London WC1E 6BT, UK

<sup>3</sup>Division of Oral Health Sciences, Department of Health Sciences, School of  
Health and Social Services, Saitama Prefectural University, 820 Sannomiya, Koshigaya,  
Saitama 343-8540, Japan

<sup>4</sup>Chiba University, Center for Preventive Medical Sciences, Chiba, Japan, 1-8-1, Inohana,  
Chuo-ku, Chiba-shi, Chiba 260-8670, Japan

\*Corresponding author: Jun Aida

E-mail: j-aida@umin.ac.jp

Supplemental Table 1. Results of Laplace regression and Cox hazard regression with multiple imputation and sampling weight among women in English Longitudinal Study of Ageing (ELSA) and Japan Gerontological Evaluation Study (JAGES)

|                                              |                       | ELSA (Women, N= 3,083)                             |                               |                                   |                 | JAGES (Women, N=6,882)                             |                               |                                   |                  |
|----------------------------------------------|-----------------------|----------------------------------------------------|-------------------------------|-----------------------------------|-----------------|----------------------------------------------------|-------------------------------|-----------------------------------|------------------|
|                                              |                       | 15th survival percentile difference (days) (95%CI) |                               | Hazard ratio on mortality (95%CI) |                 | 15th survival percentile difference (days) (95%CI) |                               | Hazard ratio on mortality (95%CI) |                  |
|                                              |                       | Univariate                                         | Multivariate                  | Univariate                        | Multivariate    | Univariate                                         | Multivariate                  | Univariate                        | Multivariate     |
| Age (Ref = 65-69)                            | 70-74                 | -931.9 (-1,273.0; -590.7)                          | -477.8 (-797.5; -158.2)       | 2.1 (1.7; 2.7)                    | 1.8 (1.4; 2.4)  | -586.6 (-731.3; -441.9)                            | -518.2 (-688.3; -348.2)       | 1.8 (1.5; 2.3)                    | 1.7 (1.4; 2.1)   |
|                                              | 75-79                 | -1,977.4 (-2,550.1; -1,404.7)                      | -1,360.2 (-1,749.5; -970.8)   | 3.7 (2.9; 4.7)                    | 3.1 (2.4; 4.0)  | -1,261.7 (-1,461.9; -1,061.5)                      | -1,040.1 (-1,241.1; -839.1)   | 2.9 (2.4; 3.6)                    | 2.6 (2.1; 3.3)   |
|                                              | 80-84                 | -2,333.9 (-2,556.1; -2,111.7)                      | -1,769.9 (-2,200.6; -1,339.2) | 5.8 (4.6; 7.3)                    | 4.5 (3.5; 5.8)  | -1,937.8 (-2,093.8; -1,781.8)                      | -1,689.0 (-1,950.4; -1,427.6) | 5.5 (4.4; 6.8)                    | 4.5 (3.5; 5.7)   |
|                                              | 85+                   | -3,062.9 (-3,251.0; -2,874.8)                      | -2,229.2 (-2,609.9; -1,848.5) | 11.4 (8.9; 14.7)                  | 8.7 (6.6; 11.5) | -3,179.7 (-3,328.4; -3,031.0)                      | -2,575.8 (-2,812.1; -2,339.5) | 15.1 (12.1; 18.8)                 | 11.0 (8.5; 14.2) |
| ADL (Ref = no ADL limitation)<br>Comorbidity | Partially disabled    | -1,180.3 (-1,420.6; -940.0)                        | -589.7 (-852.7; -326.7)       | 2.3 (2.0; 2.6)                    | 1.5 (1.3; 1.7)  | -1,815.6 (-2,152.6; -1,478.6)                      | -861.4 (-1,253.6; -469.1)     | 3.2 (2.5; 4.0)                    | 1.8 (1.4; 2.3)   |
|                                              | Cancer                | -1,004.9 (-1,242.2; -767.7)                        | -706.3 (-1,118.2; -294.3)     | 1.7 (1.4; 2.1)                    | 1.6 (1.2; 2.0)  | -1,564.8 (-1,866.3; -1,263.3)                      | -1,291.8 (-2,477.6; -106.1)   | 2.0 (1.5; 2.8)                    | 2.1 (1.6; 2.8)   |
|                                              | Heart disease         | -791.5 (-1,081.7; -501.3)                          | -380.7 (-601.3; -160.1)       | 1.6 (1.4; 1.8)                    | 1.3 (1.1; 1.5)  | -970.6 (-1,227.4; -713.7)                          | -359.6 (-545.2; -174.0)       | 1.8 (1.6; 2.2)                    | 1.4 (1.2; 1.6)   |
|                                              | Stroke                | -902.6 (-1,171.9; -633.3)                          | -282.0 (-662.0; 98.0)         | 2.1 (1.7; 2.5)                    | 1.4 (1.1; 1.7)  | -622.4 (-1,186.9; -57.8)                           | -440.1 (-2,132.7; 1,252.4)    | 1.6 (1.0; 2.5)                    | 1.1 (0.6; 1.9)   |
|                                              | Hypertension          | -117.4 (-438.1; 203.3)                             | -270.5 (-472.4; -68.5)        | 1.1 (1.0; 1.2)                    | 1.0 (0.9; 1.2)  | -73.6 (-225.6; 78.4)                               | 97.8 (-46.1; 241.8)           | 1.0 (0.9; 1.2)                    | 1.0 (0.8; 1.1)   |
|                                              | Diabetes              | -607.8 (-1,058.6; -157.0)                          | -615.2 (-863.7; -366.7)       | 1.4 (1.1; 1.7)                    | 1.3 (1.0; 1.7)  | -362.7 (-563.7; -161.8)                            | -498.0 (-705.9; -290.1)       | 1.3 (1.1; 1.6)                    | 1.4 (1.1; 1.7)   |
|                                              | Psychiatric disorders | -119.0 (-617.2; 379.1)                             | -6.9 (-300.8; 287.1)          | 1.0 (0.7; 1.3)                    | 1.0 (0.7; 1.3)  | -200.5 (-869.8; 468.9)                             | 147.9 (-933.2; 1,229.1)       | 1.0 (0.6; 1.7)                    | 0.8 (0.4; 1.3)   |
| Education (Ref = 15 years or under)          | 16-18 years           | 382.4 (-21.2; 786.0)                               | 179.1 (-109.6; 467.9)         | 0.7 (0.6; 0.9)                    | 0.9 (0.7; 1.0)  | 388.7 (173.2; 604.1)                               | 189.0 (43.1; 334.9)           | 0.8 (0.7; 0.9)                    | 0.9 (0.8; 1.0)   |
|                                              | 19 years or more      | 866.3 (239.7; 1,493.0)                             | 406.3 (-118.2; 930.7)         | 0.7 (0.5; 0.9)                    | 0.8 (0.6; 1.1)  | 560.6 (117.6; 1,003.7)                             | 82.3 (-213.4; 378.1)          | 0.7 (0.5; 1.0)                    | 0.8 (0.6; 1.2)   |

|                                                                                                                                                                                                                                                                               |                        |                             |                        |                |                |                               |                          |                |                |
|-------------------------------------------------------------------------------------------------------------------------------------------------------------------------------------------------------------------------------------------------------------------------------|------------------------|-----------------------------|------------------------|----------------|----------------|-------------------------------|--------------------------|----------------|----------------|
| Family-based social relationships (marital status, ref = married)                                                                                                                                                                                                             | Divorced & widowed     | -1,157.1 (-1,372.0; -942.3) | -63.1 (-346.9; 220.6)  | 2.0 (1.8; 2.3) | 1.1 (0.9; 1.3) | -1,116.2 (-1,259.6; -972.9)   | -124.8 (-265.4; 15.8)    | 2.1 (1.8; 2.3) | 1.1 (1.0; 1.3) |
| Friendships-based social relationships (social network, ref = meet up with friend once or more a week)<br>Physical activity (Ref = Non sport club participation)<br>Alcohol drinking (Ref = Non)<br>Smoking (Ref = Current smoker)<br>BMI (Ref = 22.5-24.9kg/m <sup>2</sup> ) | Non-married            | -1,219.1 (-1,587.8; -850.4) | -396.2 (-819.3; 27.0)  | 2.0 (1.5; 2.6) | 1.2 (0.9; 1.7) | -418.2 (-1,448.0; 611.6)      | -48.2 (-420.9; 324.5)    | 1.3 (0.9; 1.9) | 1.0 (0.7; 1.4) |
|                                                                                                                                                                                                                                                                               | Once or twice a month  | 40.3 (-577.5; 658.0)        | 12.6 (-320.1; 345.3)   | 0.8 (0.7; 1.1) | 0.9 (0.7; 1.1) | -567.8 (-809.6; -325.9)       | -158.8 (-338.9; 21.2)    | 1.3 (1.1; 1.6) | 1.1 (0.9; 1.4) |
|                                                                                                                                                                                                                                                                               | Less than once a month | -321.5 (-927.1; 284.1)      | -39.9 (-375.0; 295.2)  | 1.0 (0.8; 1.3) | 0.9 (0.7; 1.2) | -740.0 (-978.9; -501.1)       | -183.3 (-358.0; -8.6)    | 1.5 (1.3; 1.8) | 1.2 (1.0; 1.4) |
|                                                                                                                                                                                                                                                                               | Yes                    | 1,539.6 (1,032.9; 2,046.4)  | 250.9 (-135.1; 636.9)  | 0.4 (0.3; 0.6) | 0.7 (0.5; 1.0) | 1,231.9 (1,014.7; 1,449.1)    | 356.5 (151.6; 561.4)     | 0.4 (0.3; 0.5) | 0.7 (0.5; 0.9) |
| Alcohol drinking (Ref = Non)                                                                                                                                                                                                                                                  | Not every day          | 846.8 (573.5; 1,120.1)      | 452.1 (246.9; 657.3)   | 0.6 (0.5; 0.6) | 0.7 (0.6; 0.9) | 530.0 (246.9; 813.1)          | -40.2 (-290.6; 210.3)    | 0.7 (0.6; 0.9) | 1.0 (0.8; 1.3) |
|                                                                                                                                                                                                                                                                               | Every day              | 693.5 (283.3; 1,103.7)      | 363.9 (-58.9; 786.8)   | 0.6 (0.5; 0.8) | 0.7 (0.6; 0.9) | 555.8 (104.6; 1,007.0)        | 332.1 (-16.6; 680.8)     | 0.7 (0.5; 1.0) | 0.8 (0.6; 1.2) |
| Smoking (Ref = Current smoker)                                                                                                                                                                                                                                                | Past smoker            | 12.6 (-449.5; 474.7)        | 435.4 (-42.4; 913.1)   | 0.9 (0.8; 1.1) | 0.8 (0.6; 0.9) | 367.2 (-583.5; 1,317.8)       | 590.8 (-219.5; 1,401.2)  | 0.8 (0.5; 1.2) | 0.6 (0.4; 1.0) |
|                                                                                                                                                                                                                                                                               | Never smoker           | 480.2 (82.6; 877.8)         | 701.5 (242.0; 1,161.0) | 0.7 (0.6; 0.9) | 0.6 (0.5; 0.7) | 1,331.6 (861.6; 1,801.6)      | 1,100.6 (328.7; 1,872.6) | 0.5 (0.4; 0.7) | 0.4 (0.3; 0.6) |
| BMI (Ref = 22.5-24.9kg/m <sup>2</sup> )                                                                                                                                                                                                                                       | <18.5                  | -516.1 (-1,152.4; 120.2)    | -175.2 (-614.7; 264.3) | 1.9 (1.2; 2.9) | 1.4 (0.9; 2.3) | -1,673.8 (-2,053.3; -1,294.3) | -678.7 (-897.8; -459.6)  | 2.7 (2.2; 3.4) | 1.8 (1.4; 2.2) |
|                                                                                                                                                                                                                                                                               | 18.5-22.4              | -89.3 (-495.1; 316.6)       | -174.7 (-568.4; 219.0) | 1.1 (0.9; 1.4) | 1.0 (0.7; 1.3) | -453.2 (-688.6; -217.9)       | -179.3 (-348.6; -10.1)   | 1.3 (1.1; 1.6) | 1.1 (1.0; 1.3) |
|                                                                                                                                                                                                                                                                               | ≥25                    | 410.3 (36.2; 784.4)         | 239.4 (-15.6; 494.4)   | 0.8 (0.6; 0.9) | 0.8 (0.7; 1.0) | 82.8 (-134.6; 300.2)          | -61.3 (-280.0; 157.4)    | 1.0 (0.8; 1.2) | 1.0 (0.8; 1.2) |

ADL, activities of daily living; BMI, body mass index; CI, confidence interval

Supplemental Table 2. Results of Laplace regression and Cox hazard regression with multiple imputation and sampling weight among men in English Longitudinal Study of Ageing (ELSA) and Japan Gerontological Evaluation Study (JAGES)

|                                              |                       | ELSA (Men, N= 2,468)                               |                               |                                   |                | JAGES (Men, N=6,294)                               |                               |                                   |                |
|----------------------------------------------|-----------------------|----------------------------------------------------|-------------------------------|-----------------------------------|----------------|----------------------------------------------------|-------------------------------|-----------------------------------|----------------|
|                                              |                       | 15th survival percentile difference (days) (95%CI) |                               | Hazard ratio on mortality (95%CI) |                | 15th survival percentile difference (days) (95%CI) |                               | Hazard ratio on mortality (95%CI) |                |
|                                              |                       | Univariate                                         | Multivariate                  | Univariate                        | Multivariate   | Univariate                                         | Multivariate                  | Univariate                        | Multivariate   |
| Age (Ref = 65-69)                            | 70-74                 | -1,036.5 (-1,596.2; -476.8)                        | -815.5 (-1,213.5; -417.6)     | 1.9 (1.5; 2.3)                    | 1.8 (1.5; 2.3) | -1,127.0 (-1,365.7; -888.3)                        | -795.0 (-952.8; -637.1)       | 2.0 (1.7; 2.3)                    | 1.9 (1.6; 2.2) |
|                                              | 75-79                 | -1,584.1 (-2,178.6; -989.5)                        | -1,219.2 (-1,712.8; -725.6)   | 2.9 (2.4; 3.6)                    | 2.7 (2.2; 3.3) | -1,724.2 (-1,937.2; -1,511.3)                      | -1,279.5 (-1,437.8; -1,121.1) | 3.4 (2.9; 3.9)                    | 3.0 (2.5; 3.5) |
|                                              | 80-84                 | -2,038.5 (-2,589.8; -1,487.2)                      | -1,746.3 (-2,169.4; -1,323.3) | 5.0 (4.0; 6.1)                    | 4.5 (3.6; 5.7) | -2,405.9 (-2,654.1; -2,157.7)                      | -1,967.6 (-2,128.6; -1,806.7) | 5.5 (4.7; 6.5)                    | 4.8 (4.0; 5.7) |
|                                              | 85+                   | -2,343.5 (-2,861.2; -1,825.8)                      | -1,959.2 (-2,397.2; -1,521.3) | 8.2 (6.5; 10.2)                   | 6.9 (5.3; 8.8) | -2,650.4 (-2,871.1; -2,429.6)                      | -2,171.7 (-2,437.0; -1,906.4) | 9.5 (7.8; 11.6)                   | 7.8 (6.3; 9.6) |
| ADL (Ref = no ADL limitation)<br>Comorbidity | Partially disabled    | -923.1 (-1,128.2; -718.0)                          | -600.4 (-912.2; -288.6)       | 2.3 (2.0; 2.6)                    | 1.5 (1.3; 1.8) | -1,620.1 (-1,973.2; -1,266.9)                      | -686.7 (-965.2; -408.1)       | 2.8 (2.1; 3.7)                    | 1.7 (1.3; 2.2) |
|                                              | Cancer                | -885.7 (-1,200.8; -570.6)                          | -1,075.0 (-1,493.7; -656.3)   | 1.8 (1.4; 2.2)                    | 1.8 (1.5; 2.3) | -1,508.9 (-1,640.2; -1,377.5)                      | -1,471.2 (-1,737.7; -1,204.7) | 2.1 (1.7; 2.6)                    | 1.9 (1.5; 2.4) |
|                                              | Heart disease         | -669.5 (-876.4; -462.6)                            | -479.5 (-752.7; -206.4)       | 1.5 (1.3; 1.7)                    | 1.3 (1.1; 1.5) | -445.5 (-637.5; -253.4)                            | -289.6 (-417.3; -162.0)       | 1.3 (1.2; 1.5)                    | 1.2 (1.1; 1.4) |
|                                              | Stroke                | -549.1 (-762.2; -335.9)                            | -457.9 (-778.5; -137.3)       | 1.9 (1.6; 2.3)                    | 1.2 (1.0; 1.6) | -481.1 (-742.9; -219.4)                            | -158.2 (-563.6; 247.2)        | 1.8 (1.4; 2.3)                    | 1.5 (1.1; 1.9) |
|                                              | Hypertension          | 99.4 (-124.6; 323.4)                               | -21.7 (-279.6; 236.2)         | 1.0 (0.9; 1.2)                    | 1.0 (0.9; 1.1) | 145.5 (-7.9; 299.0)                                | 4.4 (-124.3; 133.0)           | 1.0 (0.9; 1.1)                    | 1.0 (0.9; 1.1) |
|                                              | Diabetes              | -210.1 (-555.5; 135.4)                             | -213.3 (-570.1; 143.5)        | 1.3 (1.1; 1.6)                    | 1.3 (1.1; 1.6) | -441.6 (-628.0; -255.2)                            | -649.2 (-786.6; -511.7)       | 1.4 (1.2; 1.6)                    | 1.4 (1.2; 1.7) |
|                                              | Psychiatric disorders | 245.9 (-243.2; 734.9)                              | 252.4 (-243.3; 748.0)         | 1.0 (0.8; 1.4)                    | 1.0 (0.7; 1.3) | -416.1 (-806.9; -25.4)                             | -630.2 (-1,167.6; -92.8)      | 1.5 (0.9; 2.3)                    | 1.2 (0.7; 1.9) |
| Education (Ref = 15 years or under)          | 16-18 years           | 497.8 (228.6; 766.9)                               | 139.1 (-166.3; 444.5)         | 0.7 (0.6; 0.8)                    | 0.8 (0.7; 1.0) | 397.8 (219.1; 576.6)                               | -52.5 (-196.4; 91.4)          | 0.8 (0.7; 0.9)                    | 0.9 (0.8; 1.1) |
|                                              | 19 years or more      | 751.9 (154.7; 1,349.0)                             | 467.8 (106.3; 829.4)          | 0.6 (0.5; 0.8)                    | 0.8 (0.6; 1.0) | 549.9 (378.7; 721.0)                               | 244.2 (89.4; 399.1)           | 0.7 (0.6; 0.8)                    | 0.9 (0.7; 1.0) |

|                                                                                                                                                                                                                                                                               |                        |                          |                           |                |                |                               |                            |                |                |
|-------------------------------------------------------------------------------------------------------------------------------------------------------------------------------------------------------------------------------------------------------------------------------|------------------------|--------------------------|---------------------------|----------------|----------------|-------------------------------|----------------------------|----------------|----------------|
| Family-based social relationships (marital status, ref = married)                                                                                                                                                                                                             | Divorced & widowed     | -720.9 (-906.9; -534.9)  | -256.9 (-531.2; 17.3)     | 1.7 (1.4; 1.9) | 1.1 (0.9; 1.3) | -861.9 (-1,023.5; -700.2)     | -166.5 (-309.7; -23.2)     | 1.8 (1.6; 2.1) | 1.3 (1.1; 1.5) |
| Friendships-based social relationships (social network, ref = meet up with friend once or more a week)<br>Physical activity (Ref = Non sport club participation)<br>Alcohol drinking (Ref = Non)<br>Smoking (Ref = Current smoker)<br>BMI (Ref = 22.5-24.9kg/m <sup>2</sup> ) | Non-married            | -609.7 (-1,365.3; 146.0) | -734.7 (-1,348.8; -120.7) | 1.3 (1.0; 1.7) | 1.3 (1.0; 1.9) | 362.4 (-539.0; 1,263.9)       | -559.3 (-2,780.9; 1,662.4) | 1.1 (0.6; 2.0) | 1.0 (0.5; 1.8) |
|                                                                                                                                                                                                                                                                               | Once or twice a month  | 131.1 (-211.8; 474.0)    | 112.1 (-230.1; 454.3)     | 0.9 (0.8; 1.1) | 0.9 (0.8; 1.1) | -196.0 (-355.3; -36.8)        | -166.1 (-326.0; -6.1)      | 1.2 (1.1; 1.4) | 1.2 (1.0; 1.4) |
|                                                                                                                                                                                                                                                                               | Less than once a month | 94.5 (-275.3; 464.2)     | 156.0 (-189.9; 501.8)     | 1.0 (0.8; 1.3) | 0.9 (0.8; 1.1) | -766.2 (-908.5; -624.0)       | -372.5 (-503.4; -241.6)    | 1.6 (1.4; 1.8) | 1.3 (1.2; 1.5) |
|                                                                                                                                                                                                                                                                               | Yes                    | 804.7 (89.1; 1,520.4)    | 311.0 (-301.5; 923.6)     | 0.5 (0.4; 0.7) | 0.7 (0.6; 1.0) | 898.7 (713.3; 1,084.0)        | 269.2 (112.2; 426.1)       | 0.5 (0.5; 0.6) | 0.8 (0.6; 0.9) |
|                                                                                                                                                                                                                                                                               | Not every day          | 191.4 (-320.1; 703.0)    | -82.1 (-610.5; 446.4)     | 0.8 (0.7; 1.0) | 1.0 (0.8; 1.3) | 744.3 (562.6; 925.9)          | 401.5 (227.1; 575.9)       | 0.7 (0.6; 0.8) | 0.9 (0.8; 1.0) |
| BMI (Ref = 22.5-24.9kg/m <sup>2</sup> )                                                                                                                                                                                                                                       | Every day              | 192.2 (-334.8; 719.1)    | 33.2 (-531.5; 598.0)      | 0.8 (0.6; 1.0) | 1.0 (0.8; 1.3) | 767.3 (627.1; 907.5)          | 340.7 (203.0; 478.4)       | 0.7 (0.6; 0.8) | 0.9 (0.8; 1.0) |
|                                                                                                                                                                                                                                                                               | Past smoker            | 337.7 (-36.4; 711.8)     | 599.7 (202.8; 996.6)      | 0.8 (0.6; 0.9) | 0.6 (0.5; 0.8) | 273.3 (63.9; 482.6)           | 396.0 (255.8; 536.2)       | 0.8 (0.7; 0.9) | 0.7 (0.6; 0.8) |
|                                                                                                                                                                                                                                                                               | Never smoker           | 493.2 (57.9; 928.5)      | 820.6 (407.6; 1,233.6)    | 0.6 (0.5; 0.8) | 0.6 (0.5; 0.8) | 550.7 (338.1; 763.4)          | 590.9 (414.8; 767.0)       | 0.7 (0.6; 0.8) | 0.6 (0.5; 0.7) |
|                                                                                                                                                                                                                                                                               | <18.5                  | -731.6 (-1,382.7; -80.5) | -394.2 (-1,499.3; 710.9)  | 2.0 (1.1; 3.6) | 1.6 (0.8; 3.0) | -1,569.1 (-1,708.5; -1,429.7) | -747.0 (-921.7; -572.3)    | 0.0 (0.0; 0.0) | 2.0 (1.7; 2.5) |
|                                                                                                                                                                                                                                                                               | 18.5-22.4              | -303.2 (-742.6; 136.1)   | -307.4 (-909.6; 294.9)    | 1.3 (1.0; 1.7) | 1.1 (0.8; 1.5) | -616.5 (-751.1; -481.8)       | -264.8 (-421.9; -107.6)    | 0.0 (0.0; 0.0) | 1.2 (1.0; 1.3) |
|                                                                                                                                                                                                                                                                               | ≥25                    | 117.8 (-225.7; 461.4)    | 84.0 (-183.2; 351.2)      | 0.8 (0.7; 1.0) | 0.9 (0.7; 1.0) | -170.6 (-349.0; 7.8)          | -193.6 (-362.1; -25.0)     | 0.0 (0.0; 0.0) | 1.1 (0.9; 1.3) |

ADL, activities of daily living; BMI, body mass index; CI, confidence interval

Supplemental Table 3. Number (%) of missing responses in English Longitudinal Study of Ageing (ELSA) and Japan Gerontological Evaluation Study (JAGES).

|                                                         | ELSA<br>(Women)<br>N= 3,083 | JAGES<br>(Women)<br>N=6,882 | ELSA<br>(Men)<br>N=2,468 | JAGES<br>(Men)<br>N=6,294 |
|---------------------------------------------------------|-----------------------------|-----------------------------|--------------------------|---------------------------|
| Age                                                     | 0 (0.0)                     | 0 (0.0)                     | 0 (0.0)                  | 0 (0.0)                   |
| ADL limitation                                          | 68 (2.3)                    | 472 (7.4)                   | 45 (1.9)                 | 241 (4.0)                 |
| Comorbidity                                             |                             |                             |                          |                           |
| Cancer                                                  | 5 (0.2)                     | 468 (7.3)                   | 2 (0.1)                  | 315 (5.3)                 |
| Heart disease                                           | 4 (0.1)                     | 447 (6.9)                   | 2 (0.1)                  | 299 (5.0)                 |
| Stroke                                                  | 4 (0.1)                     | 470 (7.3)                   | 2 (0.1)                  | 315 (5.3)                 |
| Hypertension                                            | 4 (0.1)                     | 368 (5.6)                   | 2 (0.1)                  | 264 (4.4)                 |
| Diabetes                                                | 0 (0.0)                     | 452 (7.0)                   | 0 (0.0)                  | 301 (5.0)                 |
| Psychiatric disorders                                   | 0 (0.0)                     | 468 (7.3)                   | 1 (0.0)                  | 316 (5.3)                 |
| Education                                               | 71 (2.4)                    | 121 (1.8)                   | 56 (2.3)                 | 66 (1.1)                  |
| Family-based social relationships (marital status)      | 0 (0.0)                     | 207 (3.1)                   | 0 (0.0)                  | 119 (1.9)                 |
| Friendships-based social relationships (social network) | 740 (31.6)                  | 389 (6.0)                   | 627 (34.1)               | 321 (5.4)                 |
| Physical activity                                       | 558 (22.1)                  | 1017 (17.3)                 | 368 (17.5)               | 722 (13.0)                |
| Alcohol drinking                                        | 35 (1.1)                    | 199 (3.0)                   | 43 (1.8)                 | 106 (1.7)                 |
| Smoking                                                 | 68 (2.3)                    | 395 (6.1)                   | 45 (1.9)                 | 245 (4.1)                 |
| BMI                                                     | 302 (10.9)                  | 424 (6.6)                   | 214 (9.5)                | 247 (4.1)                 |

ADL, activities of daily living; BMI, body mass index

Supplemental Table 4. Multivariate adjusted Laplace regression analysis on the 15th survival percentile difference (days (95%CI)) among women in the English Longitudinal Study of Ageing (ELSA) and the Japan Gerontological Evaluation Study (JAGES): Complete case analysis.

|                                                                                                        |                        | ELSA (Women, N=2,021)         | JAGES (Women, N=4,659)        |
|--------------------------------------------------------------------------------------------------------|------------------------|-------------------------------|-------------------------------|
| Age (Ref = 65-69)                                                                                      | 70-74                  | -675.5 (-1,042.0; -309.0)     | -445.4 (-696.6; -194.1)       |
|                                                                                                        | 75-79                  | -1,285.0 (-2,229.5; -340.5)   | -952.9 (-1,267.8; -638.0)     |
|                                                                                                        | 80-84                  | -1,582.1 (-2,047.3; -1,116.9) | -1,446.2 (-1,889.7; -1,002.7) |
|                                                                                                        | 85+                    | -2,321.0 (-2,841.2; -1,800.8) | -2,537.7 (-2,945.7; -2,129.6) |
| ADL (Ref = no ADL limitation)                                                                          | Partially disabled     | -502.7 (-1,025.1; 19.6)       | -930.1 (-1,606.6; -253.7)     |
| Comorbidity                                                                                            | Cancer                 | -987.1 (-1,688.9; -285.3)     | -1,295.9 (-2,274.6; -317.3)   |
|                                                                                                        | Heart disease          | -382.7 (-790.5; 25.1)         | -449.8 (-766.0; -133.6)       |
|                                                                                                        | Stroke                 | -464.7 (-1,242.2; 312.8)      | -512.0 (-1,520.9; 497.0)      |
|                                                                                                        | Hypertension           | -388.3 (-749.1; -27.4)        | 57.7 (-141.6; 257.0)          |
|                                                                                                        | Diabetes               | -764.3 (-1,241.1; -287.5)     | -494.5 (-782.4; -206.7)       |
|                                                                                                        | Psychiatric disorders  | 6.7 (-474.1; 487.4)           | 15.4 (-877.6; 908.3)          |
| Education (Ref = 15 years or under)                                                                    | 16-18 years            | 241.0 (-247.1; 729.2)         | 185.6 (-62.2; 433.3)          |
|                                                                                                        | 19 years or more       | 375.5 (-572.8; 1,323.7)       | 145.8 (-210.6; 502.1)         |
| Family-based social relationships (marital status, ref = married)                                      | Divorced & widowed     | -141.3 (-520.5; 237.8)        | -34.9 (-258.3; 188.4)         |
|                                                                                                        | Non-married            | -377.8 (-1,003.9; 248.3)      | -19.0 (-766.3; 728.3)         |
| Friendships-based social relationships (social network, ref = meet up with friend once or more a week) | Once or twice a month  | 43.4 (-349.6; 436.3)          | -168.0 (-445.0; 109.1)        |
|                                                                                                        | Less than once a month | 103.1 (-240.7; 447.0)         | -139.7 (-405.9; 126.4)        |
| Physical activity (Ref = Non sport club participation)                                                 | Yes                    | 59.3 (-560.1; 678.7)          | 510.1 (236.5; 783.8)          |
| Alcohol drinking (Ref = Non)                                                                           | Not every day          | 551.7 (187.1; 916.4)          | -72.7 (-426.8; 281.4)         |
|                                                                                                        | Every day              | 408.3 (-143.8; 960.4)         | 224.7 (-435.3; 884.6)         |
|                                                                                                        |                        |                               |                               |
| Smoking (Ref = Current smoker)                                                                         | Past smoker            | 501.3 (-148.4; 1,150.9)       | 525.4 (-633.8; 1,684.5)       |
|                                                                                                        | Never smoker           | 778.4 (181.6; 1,375.2)        | 1,138.8 (76.7; 2,200.9)       |
| BMI (Ref = 22.5-24.9kg/m <sup>2</sup> )                                                                | <18.5                  | -451.5 (-12,481.2; 11,578.3)  | -729.0 (-1,105.6; -352.5)     |
|                                                                                                        | 18.5-22.4              | 11.1 (-516.2; 538.4)          | -206.4 (-449.3; 36.4)         |
|                                                                                                        | ≥25                    | 270.1 (-173.0; 713.1)         | -284.4 (-575.3; 6.5)          |

ADL, activities of daily living; BMI, body mass index; CI, confidence interval

Supplemental Table 5. Multivariate adjusted Laplace regression analysis on the 15th survival percentile difference (days (95%CI)) among men in the English Longitudinal Study of Ageing (ELSA) and the Japan Gerontological Evaluation Study (JAGES): Complete case analysis.

|                                                                                                        |                        | ELSA (Men, N=1,605)           | JAGES (Men, N=4,699)          |
|--------------------------------------------------------------------------------------------------------|------------------------|-------------------------------|-------------------------------|
| Age (Ref = 65-69)                                                                                      | 70-74                  | -869.4 (-1,454.3; -284.4)     | -608.4 (-846.0; -370.8)       |
|                                                                                                        | 75-79                  | -1,283.6 (-1,988.9; -578.3)   | -1,165.1 (-1,400.2; -930.0)   |
|                                                                                                        | 80-84                  | -1,872.1 (-2,491.2; -1,253.0) | -1,805.1 (-2,173.7; -1,436.4) |
|                                                                                                        | 85+                    | -2,164.8 (-2,857.8; -1,471.9) | -2,159.2 (-2,598.0; -1,720.5) |
| ADL (Ref = no ADL limitation)                                                                          | Partially disabled     | -447.1 (-997.7; 103.5)        | -733.9 (-1,087.2; -380.7)     |
| Comorbidity                                                                                            | Cancer                 | -1,274.7 (-2,049.7; -499.6)   | -1,600.5 (-1,950.7; -1,250.3) |
|                                                                                                        | Heart disease          | -518.2 (-893.5; -142.9)       | -377.4 (-591.9; -162.9)       |
|                                                                                                        | Stroke                 | -371.8 (-914.4; 170.9)        | -137.1 (-576.7; 302.5)        |
|                                                                                                        | Hypertension           | -55.0 (-481.5; 371.5)         | -137.2 (-324.6; 50.1)         |
|                                                                                                        | Diabetes               | -239.5 (-609.4; 130.4)        | -697.9 (-925.4; -470.4)       |
|                                                                                                        | Psychiatric disorders  | 168.5 (-390.3; 727.2)         | -1,248.9 (-2,654.2; 156.3)    |
| Education (Ref = 15 years or under)                                                                    | 16-18 years            | 26.1 (-402.4; 454.6)          | -41.4 (-254.5; 171.8)         |
|                                                                                                        | 19 years or more       | 440.2 (-246.2; 1,126.5)       | 146.3 (-117.6; 410.2)         |
| Family-based social relationships (marital status, ref = married)                                      | Divorced & widowed     | -211.6 (-633.1; 209.9)        | -216.8 (-470.4; 36.8)         |
|                                                                                                        | Non-married            | -611.5 (-1,861.0; 638.0)      | 269.9 (-440.0; 979.7)         |
| Friendships-based social relationships (social network, ref = meet up with friend once or more a week) | Once or twice a month  | 266.6 (-144.8; 677.9)         | -45.7 (-277.6; 186.2)         |
|                                                                                                        | Less than once a month | 221.5 (-180.1; 623.0)         | -329.7 (-550.7; -108.8)       |
| Physical activity (Ref = Non sport club participation)                                                 | Yes                    | 468.5 (-124.5; 1,061.5)       | 250.6 (37.2; 464.0)           |
| Alcohol drinking (Ref = Non)                                                                           | Not every day          | -193.8 (-873.5; 485.9)        | 350.4 (108.8; 592.0)          |
|                                                                                                        | Every day              | 62.9 (-674.4; 800.3)          | 339.8 (132.4; 547.1)          |
|                                                                                                        | Past smoker            | 882.7 (238.0; 1,527.3)        | 407.8 (179.3; 636.3)          |
|                                                                                                        | Never smoker           | 1,013.8 (347.6; 1,680.0)      | 556.2 (248.2; 864.2)          |
| BMI (Ref = 22.5-24.9kg/m <sup>2</sup> )                                                                | <18.5                  | -492.0 (-1,534.1; 550.1)      | -785.8 (-1,048.5; -523.1)     |
|                                                                                                        | 18.5-22.4              | -141.2 (-727.4; 445.1)        | -406.8 (-664.4; -149.3)       |
|                                                                                                        | ≥25                    | 177.0 (-194.9; 548.9)         | -42.2 (-308.4; 224.0)         |

ADL, activities of daily living; BMI, body mass index; CI, confidence interval



Supplemental Table 6. Results of multivariate adjusted analysis excluded data from participants who died or dropped out during one year or two years from the baseline: analysis with multiple imputation among women in English Longitudinal Study of Ageing (ELSA) and Japan Gerontological Evaluation Study (JAGES)

|                                                                   |                       | ELSA (Women)                                      |                               |                               | JAGES (Women, N=6,882)                            |                               |                               |
|-------------------------------------------------------------------|-----------------------|---------------------------------------------------|-------------------------------|-------------------------------|---------------------------------------------------|-------------------------------|-------------------------------|
|                                                                   |                       | Differences in 15%tile of survival (days) (95%CI) |                               |                               | Differences in 15%tile of survival (days) (95%CI) |                               |                               |
|                                                                   |                       | All data (N=3,083)                                | 1 year (N=3,012)              | 2 years (N=2,931)             | All data (N=6,882)                                | 1 year (N=6,814)              | 2 years (N=6,721)             |
| Age (Ref = 65-69)                                                 | 70-74                 | -522.3 (-853.8; -190.7)                           | -550.5 (-861.4; -239.5)       | -537.0 (-802.6; -271.4)       | -545.3 (-753.2; -337.3)                           | -561.6 (-770.9; -352.3)       | -473.8 (-665.3; -282.3)       |
|                                                                   | 75-79                 | -1,429.6 (-1,821.3; -1,037.9)                     | -1,412.3 (-1,810.3; -1,014.3) | -1,294.0 (-1,647.6; -940.4)   | -1,070.8 (-1,324.9; -816.8)                       | -1,047.4 (-1,300.6; -794.1)   | -974.6 (-1,200.0; -749.3)     |
|                                                                   | 80-84                 | -1,845.3 (-2,254.2; -1,436.5)                     | -1,715.5 (-2,139.9; -1,291.1) | -1,584.2 (-1,905.8; -1,262.6) | -1,735.8 (-2,046.9; -1,424.6)                     | -1,715.5 (-2,026.0; -1,405.0) | -1,604.9 (-1,887.2; -1,322.5) |
|                                                                   | 85+                   | -2,288.9 (-2,686.4; -1,891.3)                     | -2,153.9 (-2,542.0; -1,765.9) | -1,993.9 (-2,284.8; -1,703.0) | -2,633.8 (-2,947.3; -2,320.3)                     | -2,624.7 (-2,925.8; -2,323.6) | -2,480.7 (-2,744.7; -2,216.7) |
| ADL (Ref = no ADL limitation)<br>Comorbidity                      | Partially disabled    | -560.1 (-855.1; -265.0)                           | -398.9 (-674.8; -123.0)       | -373.3 (-615.4; -131.3)       | -876.1 (-1,271.8; -480.5)                         | -618.0 (-1,345.6; 109.6)      | -515.9 (-1,020.6; -11.2)      |
|                                                                   | Cancer                | -691.2 (-1,101.6; -280.7)                         | -587.7 (-951.8; -223.5)       | -425.6 (-740.9; -110.3)       | -1,713.1 (-2,505.0; -921.2)                       | -1,202.1 (-5,319.6; 2,915.3)  | -672.1 (-1,105.0; -239.1)     |
|                                                                   | Heart disease         | -369.4 (-619.8; -119.0)                           | -478.2 (-722.4; -234.0)       | -366.9 (-599.1; -134.8)       | -384.2 (-634.9; -133.4)                           | -405.4 (-653.5; -157.4)       | -350.6 (-562.5; -138.8)       |
|                                                                   | Stroke                | -305.4 (-725.3; 114.6)                            | -230.6 (-672.4; 211.2)        | -288.5 (-758.2; 181.2)        | -497.3 (-1,334.0; 339.3)                          | -574.2 (-1,315.1; 166.8)      | -507.5 (-1,253.5; 238.4)      |
|                                                                   | Hypertension          | -280.2 (-496.9; -63.4)                            | -308.0 (-537.4; -78.5)        | -250.4 (-448.9; -51.9)        | 55.8 (-119.3; 230.9)                              | 16.5 (-152.8; 185.7)          | 16.6 (-141.3; 174.6)          |
|                                                                   | Diabetes              | -604.5 (-895.7; -313.3)                           | -576.9 (-894.9; -258.9)       | -476.9 (-797.0; -156.8)       | -455.9 (-751.0; -160.7)                           | -442.0 (-727.7; -156.3)       | -440.3 (-708.7; -171.8)       |
|                                                                   | Psychiatric disorders | 3.6 (-322.4; 329.6)                               | -105.3 (-508.8; 298.3)        | -188.9 (-512.2; 134.3)        | -78.9 (-960.0; 802.1)                             | -38.4 (-1,094.9; 1,018.0)     | 64.3 (-558.7; 687.3)          |
| Education (Ref = 15 years or under)                               | 16-18 years           | 134.6 (-140.6; 409.8)                             | 97.0 (-161.0; 355.0)          | 38.4 (-210.4; 287.2)          | 138.2 (-71.2; 347.7)                              | 185.2 (-12.6; 383.1)          | 174.0 (3.6; 344.4)            |
|                                                                   | 19 years or more      | 380.4 (-155.2; 915.9)                             | 399.6 (-259.7; 1,058.8)       | 351.4 (-18.1; 720.8)          | 51.6 (-348.5; 451.7)                              | 115.1 (-273.2; 503.4)         | 182.1 (-210.4; 574.5)         |
| Family-based social relationships (marital status, ref = married) | Divorced & widowed    | -87.0 (-368.9; 194.9)                             | -159.7 (-440.8; 121.4)        | -93.5 (-310.1; 123.1)         | -93.9 (-278.0; 90.1)                              | -43.0 (-223.0; 137.0)         | -56.7 (-228.3; 115.0)         |
|                                                                   | Non-married           | -436.5 (-875.2; 2.2)                              | -478.7 (-951.5; -5.8)         | -220.9 (-655.4; 213.7)        | -128.2 (-685.6; 429.2)                            | -154.0 (-846.9; 538.9)        | -75.1 (-624.5; 474.3)         |

|                                                                                                        |                        |                        |                        |                        |                          |                          |                         |
|--------------------------------------------------------------------------------------------------------|------------------------|------------------------|------------------------|------------------------|--------------------------|--------------------------|-------------------------|
| Friendships-based social relationships (social network, ref = meet up with friend once or more a week) | Once or twice a month  | -1.2 (-342.5; 340.0)   | 27.4 (-326.6; 381.4)   | 58.0 (-244.5; 360.5)   | -87.0 (-328.9; 154.9)    | -105.2 (-360.2; 149.9)   | -63.9 (-298.6; 170.8)   |
|                                                                                                        | Less than once a month | -34.2 (-385.6; 317.3)  | 0.0 (-385.0; 385.0)    | 83.4 (-303.2; 469.9)   | -145.6 (-358.9; 67.8)    | -139.8 (-335.4; 55.9)    | -92.5 (-264.5; 79.4)    |
| Physical activity (Ref = Non sport club participation)                                                 | Yes                    | 256.2 (-133.8; 646.3)  | 191.7 (-218.3; 601.8)  | 221.9 (-116.4; 560.3)  | 389.6 (141.8; 637.4)     | 386.1 (139.6; 632.5)     | 354.9 (110.8; 599.0)    |
| Alcohol drinking (Ref = Non)                                                                           | Not every day          | 447.4 (222.9; 671.8)   | 438.2 (195.6; 680.9)   | 399.2 (177.9; 620.6)   | 21.3 (-313.3; 355.9)     | -7.0 (-323.1; 309.2)     | -15.9 (-307.0; 275.2)   |
|                                                                                                        | Every day              | 268.0 (-185.3; 721.2)  | 207.0 (-236.5; 650.4)  | 253.3 (-94.0; 600.7)   | 400.1 (16.4; 783.8)      | 406.6 (-21.0; 834.2)     | 252.2 (-240.0; 744.3)   |
| Smoking (Ref = Current smoker)                                                                         | Past smoker            | 496.0 (13.7; 978.3)    | 337.1 (-57.6; 731.8)   | 194.5 (-107.1; 496.0)  | 718.7 (74.0; 1,363.3)    | 613.6 (-232.8; 1,459.9)  | 415.4 (-178.0; 1,008.8) |
|                                                                                                        | Never smoker           | 767.7 (302.1; 1,233.3) | 574.8 (199.3; 950.2)   | 539.2 (249.1; 829.3)   | 1,146.5 (554.3; 1,738.8) | 1,030.4 (231.4; 1,829.5) | 749.5 (309.2; 1,189.9)  |
| BMI (Ref = 22.5-24.9kg/m <sup>2</sup> )                                                                | <18.5                  | -140.3 (-595.1; 314.4) | -216.4 (-708.9; 276.1) | -297.9 (-745.4; 149.7) | -564.0 (-837.4; -290.7)  | -552.2 (-821.7; -282.8)  | -483.2 (-733.0; -233.4) |
|                                                                                                        | 18.5-22.4              | -161.5 (-538.8; 215.9) | -185.1 (-590.9; 220.6) | -124.9 (-462.5; 212.8) | -151.7 (-354.7; 51.4)    | -143.0 (-346.0; 59.9)    | -115.1 (-300.0; 69.8)   |
|                                                                                                        | ≥25                    | 242.7 (-21.5; 506.8)   | 257.2 (4.3; 510.1)     | 282.4 (-0.5; 565.4)    | -136.7 (-392.3; 118.8)   | -107.2 (-354.0; 139.5)   | -80.1 (-298.8; 138.6)   |

---

ADL, activities of daily living; BMI, body mass index; CI, confidence interval

Supplemental Table 7. Results of multivariate adjusted analysis excluded data from participants who died or dropped out during one year or two years from the baseline: analysis with multiple imputation among men in English Longitudinal Study of Ageing (ELSA) and Japan Gerontological Evaluation Study (JAGES)

|                                                                   |                       | ELSA (Men)                                        |                               |                               | JAGES (Men)                                       |                               |                               |
|-------------------------------------------------------------------|-----------------------|---------------------------------------------------|-------------------------------|-------------------------------|---------------------------------------------------|-------------------------------|-------------------------------|
|                                                                   |                       | Differences in 15%tile of survival (days) (95%CI) |                               |                               | Differences in 15%tile of survival (days) (95%CI) |                               |                               |
|                                                                   |                       | All data (N=2,468)                                | 1 year (N=2,356)              | 2 years (N=2,284)             | All data (N=6,294)                                | 1 year (N=6,167)              | 2 years (N=5,996)             |
| Age (Ref = 65-69)                                                 | 70-74                 | -818.6 (-1,207.6; -429.6)                         | -845.2 (-1,265.2; -425.2)     | -801.3 (-1,195.5; -407.1)     | -686.2 (-906.4; -466.0)                           | -637.2 (-839.7; -434.7)       | -648.6 (-844.5; -452.7)       |
|                                                                   | 75-79                 | -1,215.7 (-1,692.3; -739.2)                       | -1,094.7 (-1,498.1; -691.3)   | -1,096.3 (-1,465.3; -727.2)   | -1,234.8 (-1,434.3; -1,035.2)                     | -1,235.1 (-1,413.0; -1,057.2) | -1,205.4 (-1,378.0; -1,032.7) |
|                                                                   | 80-84                 | -1,736.6 (-2,156.2; -1,316.9)                     | -1,623.4 (-2,047.0; -1,199.8) | -1,538.6 (-1,899.4; -1,177.8) | -1,851.9 (-2,098.7; -1,605.2)                     | -1,717.2 (-1,932.8; -1,501.7) | -1,588.2 (-1,827.6; -1,348.7) |
|                                                                   | 85+                   | -1,974.7 (-2,390.6; -1,558.8)                     | -1,821.5 (-2,264.5; -1,378.4) | -1,584.1 (-1,968.0; -1,200.1) | -2,169.5 (-2,505.6; -1,833.4)                     | -2,003.1 (-2,399.9; -1,606.4) | -1,915.9 (-2,316.2; -1,515.6) |
| ADL (Ref = no ADL limitation)<br>Comorbidity                      | Partially disabled    | -591.5 (-891.8; -291.1)                           | -411.8 (-653.2; -170.5)       | -403.0 (-620.4; -185.7)       | -816.9 (-1,277.9; -356.0)                         | -629.2 (-891.7; -366.6)       | -507.0 (-955.0; -59.0)        |
|                                                                   | Cancer                | -1,104.6 (-1,475.5; -733.7)                       | -341.8 (-689.8; 6.3)          | -437.9 (-792.0; -83.8)        | -1,524.3 (-1,822.0; -1,226.5)                     | -1,226.4 (-1,643.5; -809.2)   | -948.1 (-1,387.1; -509.2)     |
|                                                                   | Heart disease         | -474.1 (-719.5; -228.7)                           | -343.9 (-593.0; -94.9)        | -269.2 (-496.7; -41.8)        | -338.9 (-514.1; -163.7)                           | -315.7 (-461.7; -169.7)       | -316.9 (-479.7; -154.0)       |
|                                                                   | Stroke                | -451.8 (-756.2; -147.3)                           | -670.1 (-1,024.0; -316.3)     | -744.1 (-1,058.1; -430.0)     | -241.0 (-644.3; 162.2)                            | -231.1 (-529.8; 67.5)         | -319.8 (-671.0; 31.4)         |
|                                                                   | Hypertension          | -13.4 (-266.0; 239.2)                             | -26.7 (-254.8; 201.4)         | -16.4 (-229.3; 196.5)         | -20.8 (-173.9; 132.3)                             | -43.8 (-190.9; 103.2)         | -123.4 (-262.2; 15.3)         |
|                                                                   | Diabetes              | -225.7 (-560.0; 108.5)                            | -223.1 (-521.4; 75.1)         | -336.6 (-623.8; -49.3)        | -671.0 (-840.8; -501.2)                           | -695.3 (-866.9; -523.7)       | -617.2 (-836.6; -397.8)       |
|                                                                   | Psychiatric disorders | 227.0 (-290.4; 744.4)                             | 19.7 (-394.0; 433.5)          | -40.0 (-724.8; 644.7)         | -669.2 (-1,273.9; -64.5)                          | -343.8 (-1,335.6; 648.0)      | -276.6 (-906.5; 353.4)        |
| Education (Ref = 15 years or under)                               | 16-18 years           | 160.8 (-139.2; 460.7)                             | -57.3 (-366.2; 251.5)         | 7.7 (-283.3; 298.8)           | -4.9 (-185.4; 175.6)                              | 26.9 (-136.9; 190.7)          | 78.3 (-87.3; 243.9)           |
|                                                                   | 19 years or more      | 458.6 (93.2; 824.1)                               | 213.3 (-96.9; 523.6)          | 157.7 (-264.0; 579.3)         | 172.7 (-43.5; 389.0)                              | 144.2 (-60.4; 348.8)          | 144.7 (-56.4; 345.8)          |
| Family-based social relationships (marital status, ref = married) | Divorced & widowed    | -237.0 (-509.3; 35.3)                             | -296.6 (-514.2; -79.0)        | -378.5 (-613.4; -143.5)       | -190.9 (-383.5; 1.7)                              | -258.7 (-455.0; -62.5)        | -278.9 (-487.2; -70.6)        |
|                                                                   | Non-married           | -765.6 (-1,343.4; -187.7)                         | -727.5 (-1,273.1; -182.0)     | -333.4 (-1,467.7; 800.8)      | -525.3 (-1,372.2; 321.6)                          | -615.0 (-1,414.6; 184.7)      | -50.4 (-2,894.7; 2,793.9)     |

|                                                                                                        |                        |                          |                             |                        |                         |                         |                         |
|--------------------------------------------------------------------------------------------------------|------------------------|--------------------------|-----------------------------|------------------------|-------------------------|-------------------------|-------------------------|
| Friendships-based social relationships (social network, ref = meet up with friend once or more a week) | Once or twice a month  | 133.0 (-213.0; 479.0)    | 139.7 (-130.1; 409.4)       | 89.6 (-153.0; 332.3)   | -60.2 (-239.3; 118.9)   | -63.2 (-240.3; 113.8)   | -83.5 (-241.9; 74.9)    |
|                                                                                                        | Less than once a month | 165.6 (-170.6; 501.9)    | 110.4 (-181.0; 401.7)       | -53.5 (-377.5; 270.5)  | -297.9 (-472.9; -122.9) | -257.7 (-423.6; -91.8)  | -177.6 (-334.6; -20.6)  |
| Physical activity (Ref = Non sport club participation)                                                 | Yes                    | 285.1 (-314.1; 884.3)    | 374.8 (-17.1; 766.7)        | 360.4 (36.2; 684.5)    | 245.7 (43.0; 448.5)     | 215.9 (3.0; 428.8)      | 189.6 (-23.5; 402.8)    |
| Alcohol drinking (Ref = Non)                                                                           | Not every day          | -60.9 (-517.7; 396.0)    | -111.5 (-475.2; 252.2)      | -206.2 (-533.3; 120.9) | 386.6 (160.8; 612.4)    | 335.0 (143.3; 526.8)    | 230.9 (72.4; 389.3)     |
|                                                                                                        | Every day              | 44.9 (-461.7; 551.6)     | -83.2 (-515.6; 349.2)       | -80.4 (-482.3; 321.6)  | 330.2 (158.9; 501.6)    | 258.7 (100.9; 416.5)    | 157.7 (6.4; 309.1)      |
| Smoking (Ref = Current smoker)                                                                         | Past smoker            | 592.9 (194.2; 991.6)     | 542.3 (169.3; 915.2)        | 503.3 (138.7; 867.9)   | 433.6 (271.9; 595.4)    | 379.6 (212.8; 546.5)    | 381.3 (219.0; 543.5)    |
|                                                                                                        | Never smoker           | 830.5 (417.7; 1,243.3)   | 748.5 (359.6; 1,137.4)      | 698.3 (313.4; 1,083.2) | 579.1 (370.5; 787.7)    | 546.2 (335.2; 757.2)    | 510.9 (314.0; 707.7)    |
| BMI (Ref = 22.5-24.9kg/m <sup>2</sup> )                                                                | <18.5                  | -415.2 (-1,537.7; 707.2) | -1,129.4 (-1,760.8; -498.0) | -139.8 (-994.8; 715.1) | -678.9 (-875.0; -482.7) | -715.9 (-923.8; -508.0) | -719.5 (-930.4; -508.6) |
|                                                                                                        | 18.5-22.4              | -292.8 (-889.9; 304.2)   | -180.3 (-564.6; 203.9)      | -57.5 (-474.7; 359.7)  | -297.3 (-487.1; -107.5) | -252.9 (-419.5; -86.3)  | -253.2 (-418.0; -88.4)  |
|                                                                                                        | ≥25                    | 78.8 (-189.6; 347.1)     | -42.0 (-329.9; 245.9)       | 44.8 (-250.1; 339.7)   | -120.5 (-329.6; 88.6)   | -78.4 (-279.1; 122.3)   | -49.3 (-232.8; 134.1)   |

---

ADL, activities of daily living; BMI, body mass index; CI, confidence interval

Supplemental Table 8. Results of Cox hazard regression with multiple imputation among women and men in English Longitudinal Study of Ageing (ELSA) and Japan Gerontological Evaluation Study (JAGES)

|                                                                                                        |                        | ELSA (Women, N= 3,083)            |                 | JAGES (Women, N=6,882)            |                  | ELSA (Men, N= 2,468)              |                | JAGES (Men, N=6,294)              |                |
|--------------------------------------------------------------------------------------------------------|------------------------|-----------------------------------|-----------------|-----------------------------------|------------------|-----------------------------------|----------------|-----------------------------------|----------------|
|                                                                                                        |                        | Hazard ratio on mortality (95%CI) |                 | Hazard ratio on mortality (95%CI) |                  | Hazard ratio on mortality (95%CI) |                | Hazard ratio on mortality (95%CI) |                |
|                                                                                                        |                        | Univariate                        | Multivariate    | Univariate                        | Multivariate     | Univariate                        | Multivariate   | Univariate                        | Multivariate   |
| Age (Ref = 65-69)                                                                                      | 70-74                  | 2.1 (1.7; 2.7)                    | 1.8 (1.4; 2.4)  | 1.8 (1.5; 2.2)                    | 1.7 (1.4; 2.1)   | 1.9 (1.5; 2.3)                    | 1.8 (1.5; 2.2) | 1.8 (1.6; 2.0)                    | 1.7 (1.4; 1.9) |
|                                                                                                        | 75-79                  | 3.7 (2.9; 4.7)                    | 3.2 (2.5; 4.0)  | 3.0 (2.5; 3.7)                    | 2.8 (2.3; 3.3)   | 2.8 (2.3; 3.5)                    | 2.6 (2.1; 3.2) | 3.2 (2.8; 3.7)                    | 2.8 (2.4; 3.2) |
|                                                                                                        | 80-84                  | 6.0 (4.7; 7.5)                    | 4.6 (3.6; 5.9)  | 5.4 (4.4; 6.5)                    | 4.6 (3.7; 5.6)   | 4.9 (4.0; 6.1)                    | 4.4 (3.6; 5.5) | 5.0 (4.3; 5.8)                    | 4.2 (3.6; 4.9) |
|                                                                                                        | 85+                    | 11.4 (9.0; 14.5)                  | 8.7 (6.7; 11.2) | 15.2 (12.6; 18.3)                 | 11.6 (9.3; 14.4) | 8.0 (6.4; 10.0)                   | 6.7 (5.2; 8.5) | 9.1 (7.6; 10.9)                   | 7.0 (5.8; 8.5) |
| ADL (Ref = no ADL limitation)<br>Comorbidity                                                           | Partially disabled     | 2.2 (1.9; 2.5)                    | 1.4 (1.2; 1.6)  | 3.2 (2.6; 4.0)                    | 1.8 (1.4; 2.2)   | 2.3 (2.0; 2.6)                    | 1.5 (1.3; 1.8) | 2.8 (2.3; 3.5)                    | 1.6 (1.3; 2.0) |
|                                                                                                        | Cancer                 | 1.6 (1.3; 1.9)                    | 1.5 (1.2; 1.8)  | 2.0 (1.5; 2.6)                    | 2.3 (1.7; 3.0)   | 1.8 (1.5; 2.2)                    | 1.8 (1.5; 2.2) | 2.2 (1.8; 2.6)                    | 2.0 (1.6; 2.3) |
|                                                                                                        | Heart disease          | 1.6 (1.4; 1.8)                    | 1.2 (1.1; 1.4)  | 1.9 (1.6; 2.2)                    | 1.4 (1.2; 1.6)   | 1.5 (1.3; 1.7)                    | 1.3 (1.1; 1.5) | 1.4 (1.3; 1.6)                    | 1.3 (1.2; 1.5) |
|                                                                                                        | Stroke                 | 2.1 (1.7; 2.6)                    | 1.4 (1.2; 1.8)  | 1.9 (1.3; 2.8)                    | 1.3 (0.9; 1.9)   | 1.9 (1.5; 2.3)                    | 1.2 (1.0; 1.5) | 1.8 (1.4; 2.3)                    | 1.5 (1.2; 1.9) |
|                                                                                                        | Hypertension           | 1.1 (1.0; 1.3)                    | 1.0 (0.9; 1.2)  | 1.0 (0.9; 1.2)                    | 1.0 (0.9; 1.1)   | 1.0 (0.9; 1.2)                    | 1.0 (0.9; 1.1) | 1.0 (0.9; 1.1)                    | 1.0 (0.9; 1.1) |
|                                                                                                        | Diabetes               | 1.4 (1.2; 1.8)                    | 1.3 (1.1; 1.7)  | 1.3 (1.1; 1.5)                    | 1.4 (1.1; 1.6)   | 1.3 (1.1; 1.6)                    | 1.3 (1.1; 1.6) | 1.4 (1.3; 1.6)                    | 1.5 (1.3; 1.7) |
|                                                                                                        | Psychiatric disorders  | 1.0 (0.7; 1.3)                    | 1.0 (0.7; 1.3)  | 1.2 (0.8; 1.8)                    | 0.9 (0.6; 1.3)   | 1.1 (0.8; 1.5)                    | 1.0 (0.7; 1.4) | 1.5 (1.0; 2.2)                    | 1.2 (0.8; 1.8) |
|                                                                                                        |                        |                                   |                 |                                   |                  |                                   |                |                                   |                |
| Education (Ref = 15 years or under)                                                                    | 16-18 years            | 0.8 (0.6; 0.9)                    | 0.9 (0.8; 1.0)  | 0.8 (0.7; 0.9)                    | 0.9 (0.8; 1.0)   | 0.7 (0.6; 0.8)                    | 0.8 (0.7; 1.0) | 0.8 (0.7; 0.9)                    | 0.9 (0.8; 1.0) |
|                                                                                                        | 19 years or more       | 0.6 (0.5; 0.8)                    | 0.8 (0.6; 1.1)  | 0.7 (0.6; 1.0)                    | 0.9 (0.7; 1.2)   | 0.6 (0.5; 0.8)                    | 0.8 (0.6; 1.0) | 0.7 (0.7; 0.9)                    | 0.9 (0.8; 1.0) |
| Family-based social relationships (marital status, ref = married)                                      | Divorced & widowed     | 1.9 (1.7; 2.2)                    | 1.1 (0.9; 1.3)  | 2.0 (1.8; 2.2)                    | 1.1 (0.9; 1.2)   | 1.7 (1.5; 2.0)                    | 1.1 (1.0; 1.3) | 1.9 (1.7; 2.1)                    | 1.3 (1.1; 1.5) |
|                                                                                                        | Non-married            | 1.9 (1.5; 2.5)                    | 1.3 (1.0; 1.7)  | 1.4 (1.0; 2.0)                    | 1.1 (0.8; 1.5)   | 1.4 (1.0; 1.9)                    | 1.4 (1.0; 1.9) | 1.3 (0.8; 2.2)                    | 1.1 (0.7; 1.9) |
| Friendships-based social relationships (social network, ref = meet up with friend once or more a week) | Once or twice a month  | 0.8 (0.7; 1.0)                    | 0.9 (0.7; 1.1)  | 1.2 (1.0; 1.5)                    | 1.1 (0.9; 1.3)   | 0.9 (0.8; 1.1)                    | 0.9 (0.8; 1.1) | 1.1 (1.0; 1.3)                    | 1.1 (1.0; 1.3) |
|                                                                                                        | Less than once a month | 1.0 (0.8; 1.3)                    | 0.9 (0.7; 1.1)  | 1.5 (1.3; 1.7)                    | 1.1 (1.0; 1.3)   | 1.0 (0.8; 1.3)                    | 0.9 (0.8; 1.1) | 1.5 (1.4; 1.7)                    | 1.3 (1.2; 1.4) |

|                                                        |               |                |                |                |                |                |                |                |                |
|--------------------------------------------------------|---------------|----------------|----------------|----------------|----------------|----------------|----------------|----------------|----------------|
| Physical activity (Ref = Non sport club participation) | Yes           | 0.4 (0.3; 0.6) | 0.7 (0.5; 0.9) | 0.4 (0.3; 0.5) | 0.7 (0.5; 0.8) | 0.5 (0.4; 0.7) | 0.8 (0.6; 1.0) | 0.6 (0.5; 0.7) | 0.8 (0.7; 0.9) |
| Alcohol drinking (Ref = Non)                           | Not every day | 0.5 (0.5; 0.6) | 0.7 (0.6; 0.8) | 0.7 (0.5; 0.8) | 1.0 (0.8; 1.2) | 0.8 (0.7; 1.0) | 1.0 (0.8; 1.2) | 0.7 (0.6; 0.8) | 0.9 (0.8; 1.0) |
|                                                        | Every day     | 0.6 (0.5; 0.8) | 0.8 (0.6; 0.9) | 0.7 (0.5; 1.0) | 0.8 (0.6; 1.2) | 0.8 (0.6; 1.0) | 1.0 (0.8; 1.3) | 0.7 (0.6; 0.8) | 0.9 (0.8; 1.0) |
| Smoking (Ref = Current smoker)                         | Past smoker   | 0.9 (0.7; 1.1) | 0.7 (0.6; 0.9) | 0.8 (0.5; 1.1) | 0.6 (0.4; 0.9) | 0.8 (0.6; 0.9) | 0.6 (0.5; 0.8) | 0.8 (0.7; 0.9) | 0.7 (0.7; 0.8) |
|                                                        | Never smoker  | 0.7 (0.6; 0.8) | 0.6 (0.5; 0.7) | 0.5 (0.4; 0.7) | 0.4 (0.3; 0.6) | 0.6 (0.5; 0.8) | 0.6 (0.5; 0.8) | 0.7 (0.6; 0.8) | 0.7 (0.6; 0.8) |
| BMI (Ref = 22.5-24.9kg/m <sup>2</sup> )                | <18.5         | 1.9 (1.3; 2.9) | 1.5 (0.9; 2.3) | 2.5 (2.1; 3.0) | 1.6 (1.3; 1.9) | 2.0 (1.1; 3.7) | 1.5 (0.8; 3.0) | 3.0 (2.6; 3.5) | 2.0 (1.7; 2.3) |
|                                                        | 18.5-22.4     | 1.1 (0.9; 1.4) | 1.0 (0.8; 1.2) | 1.3 (1.1; 1.5) | 1.1 (1.0; 1.3) | 1.3 (1.0; 1.7) | 1.1 (0.8; 1.5) | 1.5 (1.3; 1.6) | 1.2 (1.1; 1.4) |
|                                                        | ≥25           | 0.8 (0.6; 0.9) | 0.8 (0.7; 1.0) | 1.0 (0.8; 1.2) | 1.0 (0.9; 1.2) | 0.8 (0.7; 1.0) | 0.8 (0.7; 1.0) | 1.0 (0.9; 1.2) | 1.0 (0.9; 1.2) |

---

ADL, activities of daily living; BMI, body mass index; CI, confidence interval

Supplemental Table 9. Laplace regression analysis with multiple imputation on the 15th survival percentile difference (days (95%CI)) between English Longitudinal Study of Ageing (ELSA) and Japan Gerontological Evaluation Study (JAGES) among women (N=9,826): Pooled analysis.

|                                                                   |                       | Model1                        | Model2                        | Model3                        | Model4                        | Model5                        | Model6                        | Model7                        | Model8                        | Model9                        | Model10                       |
|-------------------------------------------------------------------|-----------------------|-------------------------------|-------------------------------|-------------------------------|-------------------------------|-------------------------------|-------------------------------|-------------------------------|-------------------------------|-------------------------------|-------------------------------|
| Difference between ELSA and JAGES (Ref = ELSA)                    |                       | 318.8 (158.7; 479.0)          | 311.1 (159.8; 462.5)          | 296.8 (137.3; 456.3)          | 345.5 (190.2; 500.8)          | 320.8 (166.0; 475.6)          | 313.7 (161.6; 465.7)          | 494.1 (306.8; 681.4)          | 123.1 (-55.3; 301.6)          | 449.8 (265.2; 634.3)          | 373.1 (117.3; 628.9)          |
| Age (Ref = 65-69 years)                                           | 70-74                 | -651.4 (-828.7; -474.1)       | -629.8 (-806.2; -453.4)       | -631.5 (-813.2; -449.8)       | -660.2 (-835.7; -484.8)       | -624.0 (-806.2; -441.8)       | -597.1 (-781.6; -412.5)       | -607.8 (-779.6; -435.9)       | -626.7 (-806.1; -447.3)       | -598.8 (-777.7; -419.8)       | -563.0 (-749.0; -377.1)       |
|                                                                   | 75-79                 | -1,441.6 (-1,671.6; -1,211.6) | -1,442.2 (-1,668.1; -1,216.2) | -1,412.9 (-1,642.2; -1,183.6) | -1,434.1 (-1,682.1; -1,186.2) | -1,406.9 (-1,638.8; -1,175.0) | -1,351.6 (-1,569.2; -1,134.1) | -1,382.1 (-1,608.9; -1,155.4) | -1,357.7 (-1,592.7; -1,122.7) | -1,324.4 (-1,561.1; -1,087.8) | -1,248.3 (-1,487.9; -1,008.8) |
|                                                                   | 80-84                 | -2,039.9 (-2,227.0; -1,852.8) | -1,987.8 (-2,178.6; -1,796.9) | -2,009.0 (-2,215.1; -1,803.0) | -2,061.4 (-2,247.9; -1,874.8) | -1,978.8 (-2,185.8; -1,771.8) | -1,907.0 (-2,113.8; -1,700.1) | -1,958.0 (-2,175.6; -1,740.5) | -1,970.6 (-2,176.3; -1,764.9) | -1,919.3 (-2,172.5; -1,666.2) | -1,794.9 (-2,050.5; -1,539.2) |
|                                                                   | 85+                   | -2,861.3 (-3,065.8; -2,656.9) | -2,823.6 (-3,019.7; -2,627.5) | -2,815.2 (-3,047.3; -2,583.2) | -2,763.5 (-2,950.4; -2,576.6) | -2,714.7 (-2,939.8; -2,489.5) | -2,645.6 (-2,874.5; -2,416.8) | -2,641.1 (-2,867.2; -2,415.1) | -2,680.1 (-2,898.4; -2,461.8) | -2,578.1 (-2,799.7; -2,356.5) | -2,473.8 (-2,723.4; -2,224.2) |
| ADL (Ref = no ADL limitation)                                     | Partially disabled    | -650.8 (-872.8; -428.7)       | -637.9 (-848.5; -427.4)       | -627.6 (-849.0; -406.2)       | -657.2 (-874.6; -439.8)       | -624.7 (-824.0; -425.4)       | -628.1 (-866.3; -389.9)       | -635.5 (-849.7; -421.4)       | -665.0 (-886.6; -443.5)       | -658.1 (-863.6; -452.6)       | -659.7 (-913.1; -406.3)       |
| Comorbidities                                                     | Cancer                | -807.9 (-1,333.0; -282.9)     | -771.9 (-1,170.7; -373.2)     | -851.7 (-1,445.3; -258.0)     | -755.2 (-1,138.0; -372.4)     | -758.1 (-1,161.2; -355.1)     | -793.1 (-1,253.2; -333.0)     | -773.7 (-1,205.5; -341.9)     | -799.2 (-1,120.5; -477.8)     | -832.4 (-1,271.2; -393.6)     | -897.8 (-1,344.5; -451.2)     |
|                                                                   | Heart disease         | -421.7 (-604.7; -238.6)       | -415.7 (-579.3; -252.0)       | -447.0 (-625.0; -269.0)       | -414.0 (-591.3; -236.7)       | -427.1 (-609.1; -245.0)       | -401.5 (-595.7; -207.3)       | -422.9 (-606.4; -239.4)       | -412.2 (-584.7; -239.6)       | -406.1 (-580.4; -231.8)       | -364.3 (-550.2; -178.3)       |
|                                                                   | Stroke                | -400.4 (-839.2; -38.4)        | -449.1 (-774.0; -124.3)       | -400.1 (-886.7; -86.4)        | -429.7 (-974.8; -115.4)       | -442.8 (-877.1; -8.4)         | -405.0 (-871.8; -61.8)        | -430.4 (-822.7; -38.2)        | -498.4 (-887.6; -109.2)       | -421.7 (-840.6; -2.8)         | -445.5 (-807.0; -84.0)        |
|                                                                   | Hypertension          | 13.1 (-131.4; 157.6)          | 20.1 (-123.8; 164.0)          | 6.1 (-141.9; 154.1)           | -4.2 (-145.0; 136.6)          | 5.5 (-137.3; 148.3)           | -5.6 (-152.2; 141.0)          | -9.7 (-152.6; 133.3)          | -7.6 (-148.3; 133.1)          | -54.6 (-207.4; 98.3)          | -71.1 (-223.6; 81.4)          |
|                                                                   | Diabetes              | -464.4 (-684.7; -244.2)       | -462.5 (-671.1; -254.0)       | -454.6 (-672.1; -237.1)       | -488.5 (-688.5; -288.4)       | -474.6 (-691.1; -258.0)       | -448.8 (-654.0; -243.5)       | -469.2 (-676.5; -262.0)       | -502.2 (-708.4; -296.0)       | -520.8 (-754.2; -287.5)       | -523.7 (-719.9; -327.5)       |
|                                                                   | Psychiatric disorders | -188.6 (-573.7; 196.6)        | -169.9 (-596.7; 256.8)        | -203.9 (-662.7; 254.9)        | -136.2 (-606.5; 334.2)        | -137.2 (-645.1; 370.7)        | -131.1 (-634.6; 372.4)        | -116.5 (-541.1; 308.1)        | 9.2 (-332.2; 350.6)           | -71.1 (-457.2; 314.9)         | -11.5 (-357.7; 334.8)         |
| Education (Ref = 15 years or under)                               | 16-18 years           |                               | 214.5 (64.4; 364.6)           |                               |                               | 195.5 (34.0; 357.1)           | 181.7 (13.3; 350.1)           | 205.7 (37.2; 374.1)           | 197.5 (25.2; 369.9)           | 213.4 (51.5; 375.3)           | 195.9 (30.6; 361.2)           |
|                                                                   | 19 years or more      |                               | 207.5 (-110.1; 525.1)         |                               |                               | 238.9 (-49.5; 527.2)          | 223.6 (-63.6; 510.8)          | 229.0 (-67.9; 525.8)          | 233.8 (-15.1; 482.6)          | 223.8 (-82.1; 529.7)          | 168.5 (-190.4; 527.3)         |
| Family-based social relationships (marital status, ref = married) | Divorced or widowed   |                               |                               | -78.2 (-233.1; 76.6)          |                               | -78.4 (-223.0; 66.1)          | -73.3 (-218.0; 71.4)          | -94.8 (-235.5; 45.9)          | -84.5 (-237.2; 68.2)          | -85.1 (-240.9; 70.7)          | -71.0 (-234.7; 92.7)          |
|                                                                   | Non-married           |                               |                               | -322.2 (-762.5; 118.1)        |                               | -317.1 (-750.8; 116.6)        | -312.8 (-718.3; 92.7)         | -297.6 (-754.5; 159.3)        | -243.4 (-604.4; 117.5)        | -321.8 (-730.4; 86.8)         | -276.5 (-671.7; 118.7)        |

|                                                                                                        |                                                       |                         |                        |                        |                        |                        |                         |                         |
|--------------------------------------------------------------------------------------------------------|-------------------------------------------------------|-------------------------|------------------------|------------------------|------------------------|------------------------|-------------------------|-------------------------|
| Friendship-based social relationships (social network, ref = meet up with friends once or more a week) | Once or twice a month                                 | -94.3 (-301.2; 112.6)   | -93.3 (-305.5; 118.9)  | -51.2 (-266.7; 164.2)  | -84.6 (-279.7; 110.5)  | -127.8 (-320.9; 65.4)  | -91.0 (-318.0; 136.0)   | -80.5 (-285.7; 124.8)   |
|                                                                                                        | Less than once a month                                | -276.1 (-446.1; -106.2) | -271.7 (-450.6; -92.8) | -217.9 (-399.0; -36.8) | -256.9 (-441.0; -72.7) | -263.9 (-442.7; -85.1) | -231.5 (-412.6; -50.4)  | -143.7 (-331.1; 43.7)   |
|                                                                                                        | Physical activity (Ref = No sport club participation) |                         |                        | 447.7 (224.1; 671.3)   |                        |                        |                         | 390.3 (168.9; 611.7)    |
| Alcohol drinking (Ref = Non-drinking)                                                                  | Not every day                                         |                         |                        |                        | 294.9 (103.3; 486.4)   |                        |                         | 284.3 (78.7; 489.8)     |
|                                                                                                        | Every day                                             |                         |                        |                        | 121.9 (-158.8; 402.6)  |                        |                         | 262.9 (-50.3; 576.1)    |
| Smoking (Ref = Current smoker)                                                                         | Past smoker                                           |                         |                        |                        |                        | 637.0 (254.1; 1,019.9) |                         | 554.0 (141.9; 966.0)    |
|                                                                                                        | Never smoker                                          |                         |                        |                        |                        | 987.1 (641.3; 1,332.9) |                         | 950.7 (561.3; 1,340.1)  |
| BMI (Ref = 22.5-24.9kg/m <sup>2</sup> )                                                                | <18.5                                                 |                         |                        |                        |                        |                        | -582.8 (-833.6; -332.1) | -553.5 (-813.7; -293.3) |
|                                                                                                        | 18.5-22.4                                             |                         |                        |                        |                        |                        | -150.8 (-338.9; 37.4)   | -117.3 (-314.7; 80.0)   |
|                                                                                                        | ≥25                                                   |                         |                        |                        |                        |                        | 66.5 (-134.3; 267.3)    | 47.0 (-160.7; 254.8)    |

---

ADL, activities of daily living; BMI, body mass index; CI, confidence interval



Supplemental Table 10. Laplace regression analysis with multiple imputation on the 15th survival percentile difference (days (95%CI)) between English Longitudinal Study of Ageing (ELSA) and Japan Gerontological Evaluation Study (JAGES) among men (N=8,523): Pooled analysis.

|                                                                   |                       | Model1                        | Model2                        | Model3                        | Model4                        | Model5                        | Model6                        | Model7                        | Model8                        | Model9                        | Model10                       |
|-------------------------------------------------------------------|-----------------------|-------------------------------|-------------------------------|-------------------------------|-------------------------------|-------------------------------|-------------------------------|-------------------------------|-------------------------------|-------------------------------|-------------------------------|
| Difference between ELSA and JAGES (Ref = ELSA)                    |                       | 131.6 (-27.5; 290.8)          | 99.0 (-55.4; 253.3)           | 26.2 (-157.2; 209.7)          | 177.0 (16.2; 337.8)           | 78.5 (-85.5; 242.4)           | 55.1 (-101.4; 211.6)          | 225.6 (33.0; 418.3)           | 125.1 (-37.5; 287.6)          | 290.7 (87.0; 494.4)           | 404.9 (208.4; 601.4)          |
| Age (Ref = 65-69 years)                                           | 70-74                 | -913.1 (-1,135.0; -691.3)     | -917.5 (-1,137.5; -697.6)     | -876.2 (-1,082.5; -669.9)     | -874.2 (-1,067.1; -681.2)     | -858.7 (-1,044.7; -672.7)     | -816.6 (-1,032.1; -601.1)     | -829.3 (-1,024.7; -634.0)     | -838.3 (-1,056.3; -620.3)     | -798.4 (-1,008.6; -588.1)     | -732.5 (-932.5; -532.4)       |
|                                                                   | 75-79                 | -1,399.4 (-1,606.2; -1,192.7) | -1,369.0 (-1,570.9; -1,167.2) | -1,377.9 (-1,605.8; -1,150.0) | -1,369.3 (-1,582.5; -1,156.1) | -1,334.2 (-1,533.8; -1,134.5) | -1,306.9 (-1,504.7; -1,109.1) | -1,262.4 (-1,457.6; -1,067.3) | -1,363.3 (-1,556.8; -1,169.8) | -1,279.9 (-1,476.3; -1,083.5) | -1,224.9 (-1,409.9; -1,039.9) |
|                                                                   | 80-84                 | -1,965.9 (-2,168.3; -1,763.5) | -1,953.5 (-2,156.9; -1,750.2) | -1,935.2 (-2,127.8; -1,742.5) | -1,971.5 (-2,155.7; -1,787.3) | -1,887.2 (-2,072.9; -1,701.6) | -1,839.0 (-2,030.9; -1,647.2) | -1,829.6 (-2,056.8; -1,602.4) | -1,954.0 (-2,156.3; -1,751.7) | -1,794.2 (-2,011.5; -1,576.9) | -1,801.1 (-2,012.2; -1,590.0) |
|                                                                   | 85+                   | -2,392.1 (-2,607.7; -2,176.5) | -2,424.2 (-2,632.8; -2,215.6) | -2,333.0 (-2,564.9; -2,101.1) | -2,351.6 (-2,558.3; -2,144.9) | -2,207.4 (-2,439.3; -1,975.5) | -2,178.7 (-2,430.6; -1,926.7) | -2,152.1 (-2,429.0; -1,875.1) | -2,266.6 (-2,488.8; -2,044.4) | -2,089.4 (-2,332.1; -1,846.7) | -2,096.2 (-2,389.2; -1,803.2) |
| ADL (Ref = no ADL limitation)                                     | Partially disabled    | -763.6 (-1,020.9; -506.3)     | -750.8 (-991.4; -510.1)       | -762.8 (-995.3; -530.3)       | -779.9 (-1,027.0; -532.8)     | -759.2 (-957.4; -561.1)       | -728.1 (-906.3; -550.0)       | -709.2 (-949.3; -469.1)       | -741.8 (-992.6; -490.9)       | -677.9 (-892.5; -463.4)       | -650.3 (-875.6; -424.9)       |
| Comorbidities                                                     | Cancer                | -1,318.8 (-1,545.1; -1,092.4) | -1,388.3 (-1,679.9; -1,096.8) | -1,400.7 (-1,674.9; -1,126.5) | -1,323.5 (-1,533.4; -1,113.6) | -1,367.7 (-1,631.0; -1,104.4) | -1,379.0 (-1,646.0; -1,112.1) | -1,352.2 (-1,606.8; -1,097.6) | -1,373.9 (-1,640.9; -1,107.0) | -1,356.0 (-1,567.0; -1,145.0) | -1,363.1 (-1,592.2; -1,134.1) |
|                                                                   | Heart disease         | -464.2 (-627.6; -300.9)       | -447.5 (-615.1; -279.8)       | -426.4 (-619.4; -233.3)       | -425.8 (-607.5; -244.2)       | -375.3 (-571.7; -178.8)       | -396.1 (-565.4; -226.7)       | -365.5 (-526.4; -204.6)       | -394.9 (-559.6; -230.3)       | -378.1 (-536.0; -220.2)       | -366.8 (-513.4; -220.1)       |
|                                                                   | Stroke                | -404.0 (-674.8; -133.3)       | -379.8 (-655.3; -104.3)       | -444.6 (-728.0; -161.2)       | -405.7 (-667.8; -143.5)       | -417.9 (-804.3; -31.6)        | -437.2 (-700.3; -174.0)       | -411.6 (-684.5; -138.7)       | -374.1 (-625.8; -122.3)       | -413.4 (-692.6; -134.2)       | -360.9 (-612.3; -109.5)       |
|                                                                   | Hypertension          | 115.4 (-21.6; 252.5)          | 103.4 (-35.6; 242.5)          | 108.6 (-30.6; 247.8)          | 94.7 (-36.8; 226.1)           | 84.4 (-43.8; 212.7)           | 77.5 (-50.8; 205.8)           | 68.6 (-63.8; 201.1)           | 69.9 (-65.4; 205.3)           | 27.1 (-115.5; 169.7)          | 4.6 (-127.5; 136.6)           |
|                                                                   | Diabetes              | -564.5 (-747.7; -381.3)       | -578.5 (-752.6; -404.3)       | -566.3 (-740.3; -392.3)       | -515.1 (-674.5; -355.6)       | -522.1 (-699.5; -344.7)       | -495.9 (-666.4; -325.4)       | -520.5 (-684.8; -356.3)       | -551.3 (-721.9; -380.7)       | -562.7 (-733.9; -391.6)       | -594.4 (-747.2; -441.5)       |
|                                                                   | Psychiatric disorders | -158.0 (-1,196.1; 880.1)      | -105.8 (-1,077.2; 865.6)      | -129.4 (-712.9; 454.0)        | -181.6 (-1,376.3; 1,013.1)    | -111.3 (-943.7; 721.1)        | -167.8 (-913.6; 578.0)        | -18.4 (-9,898.0; 9,861.2)     | -130.4 (-965.1; 704.3)        | -84.7 (-1,030.8; 861.5)       | -141.9 (-782.2; 498.5)        |
| Education (Ref = 15 years or under)                               | 16-18 years           |                               | 91.4 (-93.6; 276.3)           |                               |                               | 134.0 (-30.5; 298.5)          | 89.0 (-88.3; 266.3)           | 90.3 (-83.0; 263.6)           | 94.6 (-79.4; 268.7)           | 107.3 (-56.5; 271.0)          | 14.2 (-139.9; 168.3)          |
|                                                                   | 19 years or more      |                               | 328.0 (149.3; 506.7)          |                               |                               | 337.6 (159.6; 515.6)          | 299.6 (116.9; 482.3)          | 307.3 (135.4; 479.1)          | 297.7 (85.2; 510.2)           | 313.1 (139.9; 486.2)          | 230.4 (50.4; 410.3)           |
| Family-based social relationships (marital status, ref = married) | Divorced or widowed   |                               |                               | -323.2 (-495.6; -150.8)       |                               | -287.9 (-443.6; -132.3)       | -297.7 (-455.4; -140.0)       | -304.3 (-463.5; -145.0)       | -262.4 (-436.0; -88.9)        | -293.0 (-519.3; -66.7)        | -242.5 (-405.5; -79.4)        |

|                                                                                                        |                        |                           |                         |                           |                           |                         |                          |                           |                          |
|--------------------------------------------------------------------------------------------------------|------------------------|---------------------------|-------------------------|---------------------------|---------------------------|-------------------------|--------------------------|---------------------------|--------------------------|
|                                                                                                        | Non-married            | -828.7 (-1,382.0; -275.4) |                         | -860.9 (-1,402.0; -319.7) | -836.9 (-1,479.5; -194.3) | -738.7 (-1,550.1; 72.6) | -604.1 (-1,454.0; 245.7) | -769.1 (-1,395.7; -142.5) | -709.7 (-1,332.2; -87.3) |
| Friendship-based social relationships (social network, ref = meet up with friends once or more a week) | Once or twice a month  |                           | 38.3 (-130.6; 207.1)    | 20.7 (-145.3; 186.7)      | 55.9 (-111.0; 222.8)      | 19.7 (-147.3; 186.7)    | -8.8 (-172.9; 155.2)     | -25.9 (-189.7; 137.8)     | 19.4 (-141.4; 180.2)     |
| Physical activity (Ref = No sport club participation)                                                  | Less than once a month |                           | -299.9 (-451.8; -148.1) | -344.6 (-501.2; -188.0)   | -294.2 (-451.0; -137.3)   | -330.8 (-489.6; -172.0) | -325.5 (-518.2; -132.9)  | -257.9 (-421.3; -94.5)    | -192.3 (-346.0; -38.6)   |
|                                                                                                        | Yes                    |                           |                         |                           | 318.5 (115.2; 521.8)      |                         |                          |                           | 279.0 (92.4; 465.7)      |
| Alcohol drinking (Ref = Non-drinking)                                                                  | Not every day          |                           |                         |                           |                           | 312.7 (113.3; 512.2)    |                          |                           | 302.9 (120.7; 485.2)     |
|                                                                                                        | Every day              |                           |                         |                           |                           | 272.9 (101.7; 444.1)    |                          |                           | 301.3 (151.1; 451.4)     |
| Smoking (Ref = Current smoker)                                                                         | Past smoker            |                           |                         |                           |                           |                         | 493.2 (328.6; 657.7)     |                           | 449.9 (291.4; 608.3)     |
|                                                                                                        | Never smoker           |                           |                         |                           |                           |                         | 646.7 (437.3; 856.0)     |                           | 660.2 (481.6; 838.8)     |
| BMI (Ref = 22.5-24.9kg/m <sup>2</sup> )                                                                | <18.5                  |                           |                         |                           |                           |                         |                          | -774.7 (-986.3; -563.2)   | -720.2 (-940.7; -499.6)  |
|                                                                                                        | 18.5-22.4              |                           |                         |                           |                           |                         |                          | -359.2 (-544.6; -173.7)   | -306.8 (-485.1; -128.5)  |
|                                                                                                        | ≥25                    |                           |                         |                           |                           |                         |                          | -47.5 (-226.3; 131.3)     | -71.4 (-241.5; 98.8)     |

---

ADL, activities of daily living; BMI, body mass index; CI, confidence interval
